# Supplementary material
Source: PubMed Central journal article supplement (PMC5726921)
Supplement: NIHMS916451-supplement-Supplemental_Material.pdf [file NIHMS916451-supplement-Supplemental_Material.pdf]

## SUPPLEMENTAL MATERIAL

### Supplemental Methods

#### Animals

$Kit^{+/Cre-IRES-nGFP}$  ( $Kit^{+/nGFP}$ ) mice and  $Kit^{+/MerCreMer}$  ( $Kit^{+/MCM}$ ) were previously reported.<sup>1</sup> To perform genetic lineage tracing, mice were cross-bred to either R-GFP (green fluorescent protein) reporter mice (FVB.Cg-*Gt(ROSA)26Sor*<sup>tm1(CAG-lacZ,-EGFP)Gln</sup>/J, purchased from the Jackson Laboratory and previously cross-bred with germ line Frt expressing mice to generate GFP reporter mice), or R-mTmG reporter mice (B6.129(Cg)-*Gt(ROSA)26Sor*<sup>tm4(ACTB-tdTomato,-EGFP)Luo</sup>/J, purchased from the Jackson Laboratory) and to Super p53 mice (B6;CBA-Tg(Trp53)1Srn/J).<sup>2</sup> All animal procedures were performed in accordance with institutional guidelines, and approved by the University of Minnesota Institutional Animal Care and Use Committee.

#### Pharmacological treatments

Activation of inducible Cre recombinase was accomplished via either Tamoxifen injection, or Tamoxifen containing chow. Tamoxifen base (Sigma-Aldrich T5648) was dissolved in corn oil and injected intra-peritoneally for 5 consecutive days at 20mg/kg. Tamoxifen citrate containing chow (400mg/kg) was purchased from Harlan/Envigo. Three-month-old mice were treated with tamoxifen-laden chow for four weeks to induce Cre activation to allow genetic lineage tracing of c-kit<sup>+</sup> cells. Tamoxifen-containing chow was replaced with regular chow at least 72hr (6 times elimination half-time) before initiating experiments.<sup>3</sup>  $Kit^{+/MCM}$  X R-GFP mice and  $Kit^{+/MCM}$  X R-mTmG mice were treated with either one intraperitoneal injection of 5 or 10mg/kg of doxorubicin (DOX, Sigma-Aldrich, Cat #D1515), or two intraperitoneal injections of DOX (10 mg/kg at 3-day intervals, 20 mg/kg cumulative dose). Three-month-old  $Kit^{+/nGFP}$  mice were similarly

treated with one or two doses of DOX. Both male and female mice were used for all studies. Littermates that received vehicle (saline) were used as controls. Etoposide (Sigma-Aldrich, E1383) was dissolved in Dimethyl Sulfoxide (DMSO, Sigma-Aldrich, D2650) and was delivered in a similar fashion as DOX. Two intraperitoneal injections of Etoposide (1 mg/kg at 3-day intervals, 2 mg/kg cumulative dose) were administered to Kit<sup>+MCM</sup> X R-GFP mice. Control mice received the same volume of DMSO. To block the function of p53, Pifithrin- $\alpha$  (Calbiochem Inc, Cat #506132) was dissolved in DMSO and injections of 4.4 mg/kg were delivered intraperitoneally to the mice 30 min before and 3 hrs after DOX administration, followed by a daily injection at the same dose until the mice were sacrificed. To stabilize p53 protein, the small molecule RITA (Calbiochem Inc, Cat #506149) was dissolved in DMSO and 0.3 mg/kg of RITA was injected intraperitoneally to Kit<sup>+MCM</sup> X R-GFP mice twice per week for a total of 4 weeks. Control mice received equal volumes of DMSO.

### **Mouse surgery**

Cardiac pressure overload in mice was induced via transverse aortic constriction (TAC) as described previously.<sup>4</sup> Briefly, 8-12 weeks old Kit<sup>+MCM</sup> X R-GFP and Kit<sup>+MCM</sup> X R-mTmG mice, that were previously treated with tamoxifen, were anesthetized with inhaled 1.5% isoflurane. A parasternal incision was performed and the lobes of the thymus were separated to expose the transverse aorta. A 27 Gauge blunt needle was ligated against the aorta using 6-0 non-absorbable silk suture. After removal of the needle, the thoracic wall was sutured and the skin was closed using skin glue. Sham operated animals were treated similarly, although the aorta was not ligated. Sham operated animals were used as controls.

### **Cell isolation**

Cardiac CD45<sup>-</sup>c-kit<sup>+</sup> cells were isolated from adult C57Bl/6j mice (the Jackson Laboratory) following a published protocol with minor modifications.<sup>5</sup> Hearts were dissected and digested with Collagenase B, Dispase II (Roche) and DNase (Amersco) in DMEM media at 37°C. Following digestion, CD45<sup>+</sup> cells were depleted and enriched for c-kit<sup>+</sup> cells using magnetic microbeads (Miltenyi). The resulting cells were used for the experiments. Flow cytometry was performed to verify the purity of isolated CD45<sup>-</sup>c-kit<sup>+</sup> cells at every step of the isolation procedure using a BD FACS Aria II (Becton, Dickenson and Company). Cells were stained with CD45-PE, CD117-FITC and a microbead labeling check antibody conjugated to APC (Miltenyi). Propidium iodide (PI) was used as a viability marker. FACS data were analyzed in FlowJo v10. We obtained 95% enrichment of single CD45<sup>-</sup>c-kit<sup>+</sup> cells. For single cell RNA seq we isolated CD45<sup>-</sup>c-kit<sup>+</sup> cells from neonatal or adult C57Bl/6 hearts and from adult Kit<sup>+/MCM</sup> hearts. Cells were sorted by MACS, followed by PI staining and MoFlo sorting of live cells. Sorted cells were immediately stained for live/dead and used for single cell capture using the Fluidigm C1 capture system on an integrated fluidics circuit optimized for capture of cells sized 5-10µm. This size was based on measurements of CD45<sup>-</sup>c-kit<sup>+</sup> cells from adult mice, which averaged at 8.9µm. After capture, cells were imaged to assess viability, followed by RNA isolation and cDNA generation according to the Fluidigm protocol. Based on acquired images, we selected single live cells to proceed with library preparation, according to the Fluidigm protocol.<sup>6</sup> Libraries were pooled and sequenced on an Illumina HiSeq2500 at the University of Minnesota Genomics Center.

For cell culture experiments, we used neonatal and adult mice to isolate CD45<sup>-</sup>c-kit<sup>+</sup> cells according to the protocol detailed above, and cultured them in media that contained 10ng/mL basic fibroblast growth factor (bFGF), 10ng/mL leukemia inhibitory factor (LIF), and 1% penicillin/streptomycin.<sup>7</sup> 3T3 cells (ATCC) were cultured in DMEM supplemented with 10% FCS and 1% penicillin/streptomycin. C-kit depleted non-

cardiomyocytes were isolated using adult hearts digested with Collagenase B, Dispase II (Roche) and DNase (Amersco) in DMEM media at 37°C, followed by depletion of c-kit<sup>+</sup> cells using magnetic beads (Miltenyi). Experiments were performed at 70-80% confluency. DOX was added to the medium (0.5 μM final concentration) after which the cells were harvested at different time points (0 hour, 4 hours, and 24 hours after treatment) for either protein extraction or Comet assays.

Adult cardiomyocytes were isolated using retrograde perfusion with Collagenase II in modified Tyrode solution.<sup>1</sup> Immediately after isolation, we enriched for cardiomyocytes by spinning at 10g. An inverted Zeiss Axiovision microscope was used to quantify the fraction of rod shaped cardiomyocytes that was positive for GFP.

### **Histological analysis**

Hearts were harvested and processed for cryostat sectioning by prefixing in 4% paraformaldehyde for 2-3 hrs followed by overnight immersion in 30% sucrose in phosphate buffered saline (PBS). Each heart was cut into 1mm slices along the long axis of the heart using an Adult Mouse Heart Slicer (Zivic Instruments). Each slice was embedded in optimum cutting temperature (OCT, Tissue-Tek) and sectioned at a thickness of 5-10μm. Alternatively, we embedded the harvested hearts in OCT and sectioned through the entire heart. Reporter protein expression was readily observed in the absence of a GFP antibody at high contrast with background levels using either epifluorescence or confocal microscopes. GFP<sup>+</sup> cardiomyocytes were quantified using an epifluorescent microscope and a 20x objective. Cardiomyocytes were recognized by their characteristic shape and size. We quantified GFP<sup>+</sup> cardiomyocytes on multiple sections from each heart at various sectional planes, typically 6 or more. To represent the GFP<sup>+</sup> cardiomyocytes as a percentage, we quantified numbers of cardiomyocytes (c) using Wheat Germ Agglutinin stained sections, and measured the area of

cardiomyocytes (a) from at least 6 separate images. We calculated the average density of cardiomyocytes on these images ( $d=c/a$ ). Next, we generated a stitched image of an entire heart section and measured the area covered by cardiac muscle (A) using Image J. The total number of cardiomyocytes (T) on a heart section was calculated ( $T=A*d$ ), and the percentage of GFP<sup>+</sup> cardiomyocytes was derived from this ( $p=G/T*100\%$ ). For immunohistological staining, tissue sections were blocked with blocking buffer, followed by overnight primary antibody incubation at 4°C. For c-kit immunostaining, freshly isolated hearts were frozen in OCT and sectioned. Sections were blocked with PBS containing 0.5-1% BSA, 2mM EDTA and 0.03% Tween20, followed by overnight incubation with primary antibody at 4°C. The slides were then rinsed in PBS-T (PBS plus 0.1% Tween-20) three times, and incubated with secondary antibody and DAPI for one hour at room temperature. The slides were rinsed with PBS-T and covered with mounting medium (Vectashield, Cat #H-1000). Images were acquired with a Zeiss Axiovision epifluorescent microscope at the Lillehei Heart Institute or Nikon C2 and A1R confocal microscope at the University of Minnesota – University Imaging Centers, <http://uic.umn.edu>. The primary antibodies are summarized in the Supplemental Table 1.

### **Western blotting**

For Western blotting, cells were harvested at 0, 4 or 24 hours after addition of saline or DOX. Cells were collected in sample buffer supplemented with protease inhibitors. Proteins were separated using SDS-PAGE and blotted onto nitrocellulose membranes. Membranes were blocked and incubated with primary antibodies against p53 (Cell Signaling Technologies), cleaved caspase 3 (Cell Signaling Technologies) and GAPDH (Fitzgerald Industries Int.). The next day, membranes were washed, incubated with secondary antibodies IRDye 680 conjugated donkey anti-rabbit, and IRDye 800

conjugated goat anti-mouse (Licor Inc.). Immunoblots were scanned with an Odyssey Imaging System (Licor Inc.).

### **Comet assay**

To detect DNA damage we used comet assays following published protocols.<sup>8,9</sup> Briefly, neonatal and adult c-kit<sup>+</sup> cells, c-kit<sup>+</sup> depleted non-cardiomyocytes and NIH 3T3 cells (ATCC) were plated overnight and incubated with 0.5 $\mu$ M DOX for 4 or 24 hrs, trypsinized and embedded in 1% low melt-point agarose and added to microscope slides at about 8000 cells/slide. The slides were subjected to alkaline lysis solution at 4°C overnight, followed by gel electrophoresis. Slides were neutralized, stained with propidium iodide and imaged using an upright Zeiss Axiovision epifluorescent microscope. At least 50 nuclei were imaged and analyzed for each condition for every experiment. The aggregate result is a combination of 3 separate experiments. Data were analyzed using the OpenComet plugin for Image J.<sup>10</sup>

### **Flow cytometry**

To determine the frequency of lineage-traced endothelial cells, we performed flow cytometry using a BD FACS Aria II (Becton, Dickinson and Company). Cells were isolated from adult hearts after saline or DOX treatment using Collagenase B, Dispase II digestion, combined with DNase treatment. Following cell isolation, cells were stained with fluorophore-conjugated primary antibodies for CD31. Propidium iodide was used to select only live cells. GFP was readily detected without the need for antibody detection. FACS data were analyzed using FlowJo version 10.

### **RNA sequencing analysis**

#### **Single cell RNA-sequencing data processing and cell clustering**

Raw single cell RNA sequencing data was plotted in a matrix consisting of 23425 genes and 405 cells. We removed genes that were expressed two cells or less, and removed cells that expressed fewer than 1000 genes. This filtering step resulted in a matrix consisting expression data of 13443 genes from 281 cells. We used the R / DEseq2 package to normalize the read count data and performed Principal Component Analysis(PCA).<sup>11</sup> We removed the first principal component, since this component was highly correlated with the number of expressed genes. We used t-SNE to visualize the data with 5% of the eigen components, as the use of 4% to 7% of eigen components showed higher accuracy in clustering of single cell RNA sequencing data.<sup>12</sup> We used R / Rtsne software with a default perplexity parameter of 30.<sup>13</sup> We clustered cells into four clusters using Partitioning Around Medoids (PAM) clustering algorithm. The number of cluster groups is determined based on gap statistic.<sup>14</sup> To further identify similarities between the cells within these four cell clusters, and known cardiac cell types, we used gene lists that identified fibroblast, endothelial and cardiomyocyte specific genes.<sup>15-17</sup> The expression level of genes is visualized on a heat map with respect to cell labels and cell clustering groups. We co-visualized our single cell RNA seq results with previously published bulk RNA sequencing samples to understand the likely identity of identified cell groups. We processed 20 bulk samples, 5 from fibroblasts<sup>18</sup>, 3 from endothelial cells<sup>19</sup> and 12 from cardiomyocytes.<sup>20-22</sup> We combined these bulk RNA sequencing samples with our single cell RNA sequencing samples. To optimize co-visualization between bulk and single cell samples, we performed PCA and removed 4 PCs that had significant difference between bulk and single cell samples using Wilcoxon rank sum test. After this filtering, single cells and bulk samples were co-visualized using t-SNE.

### **Difference between CD45<sup>-</sup>c-kit<sup>+</sup> cells harvested from different mouse models**

To test the difference in gene expression of adult CD45<sup>-</sup>c-kit<sup>+</sup> cells harvested from wild type or Kit<sup>+/MCM</sup> mice, we selected 293 genes previously identified to be

important in distinguishing cardiac c-kit<sup>+</sup> cells from other progenitor cells.<sup>23</sup> We performed MAST, a statistical test for differential expression of single cell RNA sequencing data, to test whether these 293 genes are differentially expressed in c-kit targeted and wild type adult CD45<sup>-</sup>c-kit<sup>+</sup> cells.<sup>24</sup> Only one gene out of 293 genes, Mthfd1l, was statistically significant after FDR adjustment ( $p < 0.05$ ). We visualized gene expression data in a heat map plotting expression for all c-kit targeted and wild type adult CD45<sup>-</sup>c-kit<sup>+</sup> cells.

### **Bulk RNA sequencing after saline or DOX**

Adult wild type mice were injected with saline or 10mg/kg DOX. Four days after injection we isolated CD45<sup>-</sup>c-kit<sup>+</sup> cells following the protocol described above. We pooled CD45<sup>-</sup>c-kit<sup>+</sup> cells from 3-5 mice into 3 saline, and 5 DOX treated experimental replicates (representing 12 saline and 20 DOX treated mice). RNA was isolated using the Norgen RNA purification kit according to the manufacturer's specifications. RNA quantification (Pico Green), library preparation and RNA sequencing was performed by the University of Minnesota Genomics Center. The library was size selected to produce insert sizes of ~200bp, and 50 bp pair-end run was performed on an Illumina HiSeq2500 for greater than 20 million reads for each library. The raw RNA-seq reads were mapped to the mouse genome (mm10) by TopHat (v2.0.13) and Cufflinks (v2.2.1) pipeline. Differential expression analysis was performed by DESeq; Fisher's exact test was used to determine significance. For qPCR, we injected 8 mice with saline and 8 mice with 10mg/kg DOX and isolated CD45<sup>-</sup>c-kit<sup>+</sup> cells. For qPCR we did not pool cells from different mice. We isolated RNA using the Norgen Single Cell RNA Purification kit, and quantified RNA using the Norgen Low Abundance RNA Quantification Kit according to the manufacturer's specifications. We normalized input RNA and generated cDNA using a Superscript VILO cDNA synthesis kit (Invitrogen). We ordered Taqman primers and probes and performed qPCR on a 7900HT Fast Real-Time PCR System (Applied



Biosystems). Relative Real-time PCR quantification was normalized to GAPDH based on the 2(-delta delta C(t)) method.<sup>25</sup>

## Statistics

Results are described as mean  $\pm$  SEM. Student's t-tests were performed when comparing 2 conditions, ANOVA followed by Tukey's HSD *post-hoc* analysis was used for multiple condition comparison. A p-value less than 0.05 was considered significant.

**Supplemental Table 1.** Overview of primary antibodies used.

| Antigen           | Manufacturer                        | Catalog #     | Type              | Immuno-histochemistry | Flow cytometry | Western blot |
|-------------------|-------------------------------------|---------------|-------------------|-----------------------|----------------|--------------|
| CD31              | BD Bioscience                       | 553370        | Rat monoclonal    | 1:200                 |                |              |
| CD45              | R&D systems                         | AF114         | Goat polyclonal   | 1:200                 |                |              |
| Vimentin          | Abcam                               | Ab45939       | Rabbit polyclonal | 1:200                 |                |              |
| Troponin T        | Cell signaling                      | 5593          | Rabbit polyclonal | 1:250                 |                |              |
| GATA4             | R&D systems                         | AF2606        | Goat polyclonal   | 1:200                 |                |              |
| Kdr               | R&D systems                         | AF644         | Mouse polyclonal  | 1:50                  |                |              |
| $\gamma$ H2Ax     | Cell signaling                      | 9718          | Rabbit monoclonal | 1:400                 |                |              |
| P53               | Santa Cruz                          | Sc-6243       | Rabbit polyclonal | 1:100                 |                |              |
| 53BP1             | Novus Biologicals                   | NB100-304     | Rabbit polyclonal | 1:200                 |                |              |
| CD31              | eBioscience                         | Clone MEC13.3 | Rat monoclonal    |                       | 1:100          |              |
| CD45              | BD Bioscience                       | Clone 104     | Goat polyclonal   |                       | 1:200          |              |
| P53               | Cell Signaling Technology           | 2524          | Rabbit polyclonal |                       |                | 1:1000       |
| Cleaved Caspase 3 | Cell Signaling Technology           | 9661          | Rabbit polyclonal |                       |                | 1:1000       |
| GAPDH             | Fitzgerald Industries International | 10R-G109a     | Mouse monoclonal  |                       |                | 1:1,000      |
| Nkx2-5            | Santa Cruz                          | sc-8697       | Goat polyclonal   | 1:50                  |                |              |

**Supplemental Table 2.** Cardiac function measured by echocardiography in response to the indicated treatments. Presented are means of measured values. \*p<0.05 vs echocardiographic measurement before treatment.

| Genotype                     | Treatment  | N  | LVEDD (mm) | LVESD (mm) | FS (%) |
|------------------------------|------------|----|------------|------------|--------|
| R-GFP                        | DOX 2x10mg | 10 | 3.78       | 2.74       | 28.0*  |
| Kit <sup>+/MCM</sup> X R-GFP | DOX 2x10mg | 10 | 3.78       | 2.82       | 26.6*  |
| Kit <sup>+/MCM</sup> X R-GFP | DOX 1x10mg | 4  | 3.86       | 2.24       | 42.1   |
| Kit <sup>+/MCM</sup> X R-GFP | DOX 1x5mg  | 4  | 3.47       | 2.22       | 42.0   |

**Supplemental Table 3.** Overview of genes with significantly altered gene expression measured by RNA sequencing of CD45-c-kit+ cells harvested 4 days after saline or Doxorubicin (10mg/kg) injection, based on RNA seq of 3 and 5 pooled samples respectively.

| Symbol        | Gene name                                                         | Reference seq | Fold Change | P value  |
|---------------|-------------------------------------------------------------------|---------------|-------------|----------|
| Rab3b         | RAB3B, member RAS oncogene family                                 | NM_023537     | -6.40       | 3.58E-12 |
| Nefl          | neurofilament, light polypeptide                                  | NM_010910     | -6.38       | 2.07E-12 |
| Gpr34         | G protein-coupled receptor 34                                     | NM_011823     | -6.36       | 1.21E-12 |
| Ntrk3         | neurotrophic tyrosine kinase, receptor, type 3                    | NM_182809     | -6.27       | 1.66E-10 |
| Bnc1          | basonuclin 1                                                      | NM_007562     | -6.21       | 2.11E-11 |
| Gpt           | glutamic pyruvic transaminase, soluble                            | NM_182805     | -5.62       | 1.94E-10 |
| Th            | tyrosine hydroxylase                                              | NM_009377     | -5.60       | 8.09E-09 |
| Cib2          | calcium and integrin binding family member 2                      | NM_019686     | -5.60       | 8.34E-09 |
| Lrrc48        | leucine rich repeat containing 48                                 | NM_029044     | -5.54       | 8.34E-09 |
| Echdc3        | enoyl Coenzyme A hydratase domain containing 3                    | NM_024208     | -5.53       | 4.25E-08 |
| Zfp618        | zinc finger protein 618                                           | NM_028326     | -5.48       | 3.84E-15 |
| 2900005J15Rik | RIKEN cDNA 2900005J15 gene                                        | NR_027851     | -5.47       | 6.15E-08 |
| Abhd3         | abhydrolase domain containing 3                                   | NM_134130     | -5.45       | 1.66E-10 |
| Gm684         | predicted gene 684                                                | NM_001195681  | -5.29       | 6.15E-08 |
| Ebf4          | early B cell factor 4                                             | NM_001110513  | -5.25       | 1.41E-07 |
| Tyro3         | TYRO3 protein tyrosine kinase 3                                   | NM_019392     | -5.14       | 3.27E-06 |
| Ptpn          | protein tyrosine phosphatase, receptor type, N                    | NM_008985     | -5.12       | 9.22E-07 |
| Rassf7        | Ras association (RalGDS/AF-6) domain family (N-terminal) member 7 | NM_025886     | -5.09       | 1.04E-06 |
| Cyp2d11       | cytochrome P450, family 2, subfamily d, polypeptide 11            | NM_001104531  | -4.90       | 5.94E-07 |
| AA986860      | expressed sequence AA986860                                       | NM_177604     | -4.79       | 4.01E-05 |
| Wfdc21        | WAP four-disulfide core domain 21                                 | NM_183249     | -4.73       | 4.01E-05 |
| Dancr         | differentiation antagonizing non-protein coding RNA               | NR_015531     | -4.65       | 4.53E-05 |
| Lacc1         | laccase (multicopper oxidoreductase) domain containing 1          | NM_172488     | -4.59       | 6.72E-05 |
| Exd1          | exonuclease 3'-5' domain containing 1                             | NM_172857     | -4.48       | 2.36E-04 |
| Zscan20       | zinc finger and SCAN domains 20                                   | NM_177758     | -4.40       | 1.43E-04 |
| Cd79b         | CD79B antigen                                                     | NM_008339     | -4.39       | 4.20E-04 |

|               |                                                                                 |              |       |          |
|---------------|---------------------------------------------------------------------------------|--------------|-------|----------|
| Adap1         | ArfGAP with dual PH domains 1                                                   | NM_172723    | -4.38 | 2.07E-04 |
| 4930563E22Rik | RIKEN cDNA 4930563E22 gene                                                      | NM_001163728 | -4.33 | 5.38E-04 |
| Skida1        | SKI/DACH domain containing 1                                                    | NM_028317    | -4.30 | 4.48E-04 |
| Gm10451       | predicted gene 10451                                                            | NR_028520    | -4.29 | 3.75E-04 |
| Wdr38         | WD repeat domain 38                                                             | NM_029687    | -4.24 | 8.36E-04 |
| Pls1          | plastin 1 (l-isoform)                                                           | NM_001033210 | -4.20 | 1.45E-04 |
| 2010003K11Rik | RIKEN cDNA 2010003K11 gene                                                      | NM_027237    | -4.20 | 1.01E-03 |
| Zfp551        | zinc fingr protein 551                                                          | NM_001033820 | -4.17 | 1.29E-04 |
| A230073K19Rik | RIKEN cDNA A230073K19 gene                                                      | NR_033229    | -4.12 | 1.30E-03 |
| Prkag2os1     | protein kinase, AMP-activated, gamma 2 non-catalytic subunit, opposite strand 1 | NR_040684    | -4.11 | 1.61E-03 |
| Gpsm2         | G-protein signalling modulator 2 (AGS3-like, <i>C. elegans</i> )                | NM_029522    | -4.11 | 3.56E-04 |
| Ckmt1         | creatine kinase, mitochondrial 1, ubiquitous                                    | NM_009897    | -4.06 | 2.06E-04 |
| Agfg2         | ArfGAP with FG repeats 2                                                        | NM_145566    | -4.04 | 1.58E-03 |
| 4632428C04Rik | RIKEN cDNA 4632428C04 gene                                                      | NR_033631    | -4.02 | 1.61E-03 |
| Lctl          | lactase-like                                                                    | NM_145835    | -4.01 | 2.36E-03 |
| Ccdc92        | coiled-coil domain containing 92                                                | NM_144819    | -4.01 | 2.68E-03 |
| Aldh1b1       | aldehyde dehydrogenase 1 family, member B1                                      | NM_028270    | -3.97 | 2.49E-03 |
| 9430083A17Rik | RIKEN cDNA 9430083A17 gene                                                      | NR_029463    | -3.95 | 3.27E-03 |
| Rapgef6       | Rap guanine nucleotide exchange factor (GEF) 6                                  | NM_001252498 | -3.93 | 3.50E-03 |
| Tstd1         | thiosulfate sulfurtransferase (rhodanese)-like domain containing 1              | NM_001164525 | -3.86 | 2.06E-04 |
| A230020J21Rik | RIKEN cDNA A230020J21 gene                                                      | NR_027298    | -3.85 | 3.34E-03 |
| Actr3b        | ARP3 actin-related protein 3B                                                   | NM_001004365 | -3.82 | 4.95E-03 |
| Slc5a6        | solute carrier family 5 (sodium-dependent vitamin transporter), member 6        | NM_001177622 | -3.77 | 4.05E-03 |
| Tmem26        | transmembrane protein 26                                                        | NM_177794    | -3.77 | 5.38E-04 |
| Ttll6         | tubulin tyrosine ligase-like family, member 6                                   | NM_172799    | -3.76 | 6.93E-03 |
| Gm3604        | predicted gene 3604                                                             | NM_001162910 | -3.67 | 2.49E-08 |
| Mkrn2os       | makorin, ring finger protein 2, opposite strand                                 | NM_001101431 | -3.67 | 8.04E-03 |
| Scml2         | sex comb on midleg-like 2 ( <i>Drosophila</i> )                                 | NM_133194    | -3.64 | 1.08E-02 |
| Sgtb          | small glutamine-rich tetratricopeptide repeat (TPR)-containing, beta            | NM_144838    | -3.62 | 1.01E-03 |
| Slc9a9        | solute carrier family 9 (sodium/hydrogen exchanger),                            | NM_177909    | -3.62 | 2.49E-03 |

|               |                                                                 |              |       |          |
|---------------|-----------------------------------------------------------------|--------------|-------|----------|
|               | member 9                                                        |              |       |          |
| Gm20337       | predicted gene, 20337                                           | NR_045057    | -3.59 | 5.76E-03 |
| 1700066B19Rik | RIKEN cDNA 1700066B19 gene                                      | NM_001033168 | -3.58 | 2.03E-03 |
| Mks1          | Meckel syndrome, type 1                                         | NM_001039684 | -3.58 | 3.03E-03 |
| Tha1          | threonine aldolase 1                                            | NM_027919    | -3.58 | 2.68E-03 |
| Slc38a7       | solute carrier family 38, member 7                              | NM_172758    | -3.54 | 4.95E-03 |
| Cd59a         | CD59a antigen                                                   | NM_001111060 | -3.53 | 2.02E-03 |
| Nqo2          | NAD(P)H dehydrogenase, quinone 2                                | NM_001163242 | -3.51 | 1.61E-03 |
| Acaa1b        | acetyl-Coenzyme A acyltransferase 1B                            | NM_146230    | -3.48 | 2.04E-02 |
| Mfsd7c        | major facilitator superfamily domain containing 7C              | NM_145447    | -3.46 | 1.93E-03 |
| Chrm2         | cholinergic receptor, muscarinic 2, cardiac                     | NM_203491    | -3.43 | 2.48E-02 |
| Irf4          | interferon regulatory factor 4                                  | NM_013674    | -3.42 | 2.37E-02 |
| Omp           | olfactory marker protein                                        | NM_011010    | -3.41 | 2.54E-02 |
| Zfp839        | zinc finger protein 839                                         | NM_028365    | -3.39 | 2.35E-02 |
| Adssl1        | adenylosuccinate synthetase like 1                              | NM_007421    | -3.39 | 1.14E-02 |
| Grb7          | growth factor receptor bound protein 7                          | NM_010346    | -3.39 | 2.03E-02 |
| Lrrc27        | leucine rich repeat containing 27                               | NM_027164    | -3.37 | 2.75E-02 |
| Mir199a-1     | microRNA 199a-1                                                 | NR_029585    | -3.37 | 1.08E-02 |
| Hp            | haptoglobin                                                     | NM_017370    | -3.36 | 2.32E-02 |
| Zfp473        | zinc finger protein 473                                         | NM_178734    | -3.36 | 1.08E-02 |
| Twist2        | twist basic helix-loop-helix transcription factor 2             | NM_007855    | -3.35 | 2.85E-02 |
| Ggt7          | gamma-glutamyltransferase 7                                     | NM_144786    | -3.35 | 3.12E-02 |
| Myo5c         | myosin VC                                                       | NM_001081322 | -3.35 | 3.08E-02 |
| Itih3         | inter-alpha trypsin inhibitor, heavy chain 3                    | NM_008407    | -3.34 | 4.95E-03 |
| Hs3st3a1      | heparan sulfate (glucosamine) 3-O-sulfotransferase 3A1          | NM_178870    | -3.32 | 3.37E-02 |
| Hcar2         | hydroxycarboxylic acid receptor 2                               | NM_030701    | -3.32 | 3.01E-02 |
| Sv2a          | synaptic vesicle glycoprotein 2 a                               | NM_022030    | -3.31 | 3.48E-02 |
| Ifnlr1        | interferon lambda receptor 1                                    | NM_174851    | -3.30 | 3.61E-02 |
| Alx1          | ALX homeobox 1                                                  | NM_172553    | -3.29 | 3.58E-02 |
| Nefm          | neurofilament, medium polypeptide                               | NM_008691    | -3.28 | 1.58E-02 |
| Ngb           | neuroglobin                                                     | NM_022414    | -3.27 | 3.34E-02 |
| Vat1l         | vesicle amine transport protein 1 homolog-like (T. californica) | NM_173016    | -3.26 | 3.95E-02 |
| Ror2          | receptor tyrosine kinase-like orphan receptor 2                 | NM_013846    | -3.25 | 3.12E-02 |

|               |                                                                           |              |       |          |
|---------------|---------------------------------------------------------------------------|--------------|-------|----------|
| Gm10516       | predicted gene 10516                                                      | NR_033536    | -3.24 | 4.07E-02 |
| Atp6v1g2      | ATPase, H <sup>+</sup> transporting, lysosomal V1 subunit G2              | NM_023179    | -3.24 | 1.01E-02 |
| Mal           | myelin and lymphocyte protein, T cell differentiation protein             | NM_010762    | -3.23 | 6.93E-03 |
| Wdr54         | WD repeat domain 54                                                       | NM_023790    | -3.23 | 4.25E-02 |
| Lhfp15        | lipoma HMGIC fusion partner-like 5                                        | NM_026571    | -3.23 | 4.27E-02 |
| Myot          | myotilin                                                                  | NM_001033621 | -3.21 | 4.48E-02 |
| Yeats2        | YEATS domain containing 2                                                 | NM_001145931 | -3.21 | 4.20E-02 |
| Wnt5b         | wingless-type MMTV integration site family, member 5B                     | NM_009525    | -3.21 | 4.48E-02 |
| Kctd19        | potassium channel tetramerisation domain containing 19                    | NM_177791    | -3.21 | 3.70E-02 |
| Ly6g5b        | lymphocyte antigen 6 complex, locus G5B                                   | NM_148939    | -3.20 | 5.76E-03 |
| Cdhr1         | cadherin-related family member 1                                          | NM_130878    | -3.20 | 4.48E-02 |
| Clstn2        | calsyntenin 2                                                             | NM_022319    | -3.20 | 4.48E-02 |
| Stac2         | SH3 and cysteine rich domain 2                                            | NM_146028    | -3.18 | 3.03E-02 |
| Rbfa          | ribosome binding factor A                                                 | NM_199197    | -3.17 | 8.22E-06 |
| Zfp689        | zinc finger protein 689                                                   | NM_175163    | -3.16 | 1.61E-03 |
| Tmem11        | transmembrane protein 11                                                  | NM_001168507 | -3.16 | 9.13E-03 |
| Fam118a       | family with sequence similarity 118, member A                             | NM_177067    | -3.15 | 2.57E-02 |
| Impa2         | inositol (myo)-1(or 4)-monophosphatase 2                                  | NM_053261    | -3.14 | 2.03E-02 |
| Spock2        | sparc/osteonectin, cwcv and kazal-like domains proteoglycan 2             | NM_052994    | -3.12 | 2.02E-02 |
| B630019K06Rik | novel protein similar to F-box and leucine-rich repeat protein 17 (Fbx17) | NR_045448    | -3.11 | 4.53E-02 |
| Trnp1         | TMF1-regulated nuclear protein 1                                          | NM_001081156 | -3.10 | 4.63E-02 |
| Chrna3        | cholinergic receptor, nicotinic, alpha polypeptide 3                      | NM_145129    | -3.10 | 4.89E-02 |
| Nppb          | natriuretic peptide type B                                                | NM_008726    | -3.09 | 4.48E-02 |
| Slc6a20b      | solute carrier family 6 (neurotransmitter transporter), member 20B        | NM_011731    | -3.05 | 2.58E-02 |
| Cdkn1a        | cyclin-dependent kinase inhibitor 1A (P21)                                | NM_001111099 | -3.05 | 4.12E-02 |
| Rps19-ps3     | ribosomal protein S19, pseudogene 3                                       | NR_033639    | -3.05 | 3.21E-03 |
| Anks6         | ankyrin repeat and sterile alpha motif domain containing 6                | NM_001024136 | -3.04 | 1.81E-02 |
| Ropn1l        | ropporin 1-like                                                           | NM_145852    | -3.03 | 4.51E-02 |
| Icam4         | intercellular adhesion molecule 4, Landsteiner-Wiener blood group         | NM_023892    | -3.03 | 6.99E-03 |

|               |                                                                            |              |       |          |
|---------------|----------------------------------------------------------------------------|--------------|-------|----------|
| Nol3          | nucleolar protein 3 (apoptosis repressor with CARD domain)                 | NM_030152    | -3.01 | 1.52E-02 |
| 9330159F19Rik | RIKEN cDNA 9330159F19 gene                                                 | NM_001162537 | -3.00 | 2.45E-06 |
| Mtbp          | Mdm2, transformed 3T3 cell double minute p53 binding protein               | NM_001168250 | -2.99 | 2.46E-02 |
| Cfd           | complement factor D (adipsin)                                              | NM_013459    | -2.98 | 3.18E-02 |
| Phospho1      | phosphatase, orphan 1                                                      | NM_153104    | -2.98 | 6.16E-03 |
| Tigd3         | tigger transposable element derived 3                                      | NM_198634    | -2.93 | 4.89E-03 |
| Gnb3          | guanine nucleotide binding protein (G protein), beta 3                     | NM_013530    | -2.92 | 3.86E-02 |
| Ppp1r16a      | protein phosphatase 1, regulatory (inhibitor) subunit 16A                  | NM_033371    | -2.91 | 9.38E-03 |
| Panx1         | pannexin 1                                                                 | NM_019482    | -2.86 | 1.07E-04 |
| Wipf3         | WAS/WASL interacting protein family, member 3                              | NM_001167860 | -2.85 | 4.55E-02 |
| Ngp           | neutrophilic granule protein                                               | NM_008694    | -2.82 | 2.48E-02 |
| Gtf2ird2      | GTF2I repeat domain containing 2                                           | NM_053266    | -2.77 | 3.11E-02 |
| Hpx           | hemopexin                                                                  | NM_017371    | -2.76 | 2.37E-03 |
| Cchcr1        | coiled-coil alpha-helical rod protein 1                                    | NM_146248    | -2.76 | 9.94E-03 |
| Rhot2         | ras homolog gene family, member T2                                         | NM_145999    | -2.64 | 2.05E-03 |
| 1700096K18Rik | RIKEN cDNA 1700096K18 gene                                                 | NR_027388    | -2.60 | 1.58E-03 |
| Igdcc4        | immunoglobulin superfamily, DCC subclass, member 4                         | NM_020043    | -2.47 | 2.60E-02 |
| Dlg2          | discs, large homolog 2 (Drosophila)                                        | NM_011807    | -2.43 | 3.23E-02 |
| Cyp2e1        | cytochrome P450, family 2, subfamily e, polypeptide 1                      | NM_021282    | -2.41 | 4.45E-02 |
| Katnal1       | katanin p60 subunit A-like 1                                               | NM_153572    | -2.36 | 1.49E-02 |
| Tbc1d10a      | TBC1 domain family, member 10a                                             | NM_134023    | -2.29 | 1.11E-02 |
| Spa17         | sperm autoantigenic protein 17                                             | NM_011449    | -2.12 | 2.03E-02 |
| Syvn1         | synovial apoptosis inhibitor 1, synoviolin                                 | NM_028769    | -2.09 | 3.39E-02 |
| Slc10a7       | solute carrier family 10 (sodium/bile acid cotransporter family), member 7 | NM_029736    | -1.94 | 3.90E-02 |
| 4930594C11Rik | G1 to S phase transition pseudogene                                        | NR_024017    | -1.83 | 7.88E-03 |
| Nup133        | nucleoporin 133                                                            | NM_172288    | -1.71 | 2.75E-02 |
| Malsu1        | mitochondrial assembly of ribosomal large subunit 1                        | NM_029353    | -1.62 | 1.72E-02 |
| Aldh1a2       | aldehyde dehydrogenase family 1, subfamily A2                              | NM_009022    | -1.50 | 1.98E-02 |
| Ccng1         | cyclin G1                                                                  | NM_009831    | -1.41 | 4.48E-02 |
| Tmem41b       | transmembrane protein 41B                                                  | NM_153525    | -1.38 | 3.34E-02 |

|               |                                                                            |              |       |          |
|---------------|----------------------------------------------------------------------------|--------------|-------|----------|
| 1110007C09Rik | RIKEN cDNA 1110007C09 gene                                                 | NM_026738    | -1.35 | 3.36E-03 |
| Mrpl39        | mitochondrial ribosomal protein L39                                        | NM_017404    | -1.30 | 3.76E-02 |
| Tstd3         | thiosulfate sulfurtransferase (rhodanese)-like domain containing 3         | NM_029840    | -1.25 | 1.96E-02 |
| Tm7sf3        | transmembrane 7 superfamily member 3                                       | NM_026281    | -1.09 | 3.75E-02 |
| Emc7          | ER membrane protein complex subunit 7                                      | NM_133749    | -1.06 | 2.57E-03 |
| Mgst1         | microsomal glutathione S-transferase 1                                     | NM_019946    | -0.99 | 4.63E-02 |
| Pgrmc2        | progesterone receptor membrane component 2                                 | NM_027558    | -0.88 | 3.75E-02 |
| Naa50         | N(alpha)-acetyltransferase 50, NatE catalytic subunit                      | NM_028108    | -0.87 | 4.89E-02 |
| Pnkp          | polynucleotide kinase 3'-phosphatase                                       | NM_021549    | -0.73 | 2.95E-02 |
| Zscan26       | zinc finger and SCAN domain containing 26                                  | NM_001013786 | -0.59 | 2.75E-02 |
| Snx3          | sorting nexin 3                                                            | NM_017472    | -0.39 | 3.39E-02 |
| Timp3         | tissue inhibitor of metalloproteinase 3                                    | NM_011595    | 0.22  | 2.23E-02 |
| Fam198b       | family with sequence similarity 198, member B                              | NM_133187    | 0.44  | 5.69E-03 |
| Gosr2         | golgi SNAP receptor complex member 2                                       | NM_019650    | 0.47  | 3.65E-02 |
| Rnf31         | ring finger protein 31                                                     | NM_194346    | 0.55  | 2.48E-02 |
| Grn           | granulin                                                                   | NM_008175    | 0.59  | 1.13E-02 |
| Otud5         | OTU domain containing 5                                                    | NM_138604    | 0.62  | 3.33E-02 |
| Skiv2l2       | superkiller viralicidic activity 2-like 2 ( <i>S. cerevisiae</i> )         | NM_028151    | 0.66  | 5.91E-03 |
| Cdc40         | cell division cycle 40                                                     | NM_027879    | 0.67  | 4.95E-03 |
| Trmt10b       | tRNA methyltransferase 10B                                                 | NM_027266    | 0.76  | 4.95E-03 |
| Myh10         | myosin, heavy polypeptide 10, non-muscle                                   | NM_175260    | 0.82  | 4.27E-02 |
| Plekhm1       | pleckstrin homology domain containing, family M (with RUN domain) member 1 | NM_183034    | 0.87  | 6.99E-03 |
| Csnk1g1       | casein kinase 1, gamma 1                                                   | NM_173185    | 0.87  | 9.77E-03 |
| lppk          | inositol 1,3,4,5,6-pentakisphosphate 2-kinase                              | NM_199056    | 0.88  | 5.98E-03 |
| Socs5         | suppressor of cytokine signaling 5                                         | NM_019654    | 0.92  | 5.76E-03 |
| Gab1          | growth factor receptor bound protein 2-associated protein 1                | NM_021356    | 0.92  | 1.62E-02 |
| Cog7          | component of oligomeric golgi complex 7                                    | NM_001033318 | 0.92  | 4.20E-02 |
| Arhgef3       | Rho guanine nucleotide exchange                                            | NM_027871    | 0.93  | 3.37E-02 |



|         |                                                                                                           |              |      |          |
|---------|-----------------------------------------------------------------------------------------------------------|--------------|------|----------|
|         | factor (GEF) 3                                                                                            |              |      |          |
| Slc41a1 | solute carrier family 41, member 1                                                                        | NM_173865    | 0.94 | 4.45E-02 |
| Heyl    | hairy/enhancer-of-split related with YRPW motif-like                                                      | NM_013905    | 0.95 | 2.32E-02 |
| Zcchc24 | zinc finger, CCHC domain containing 24                                                                    | NM_001101433 | 0.95 | 5.91E-03 |
| Apc     | adenomatosis polyposis coli                                                                               | NM_007462    | 0.97 | 4.15E-04 |
| Tbcel   | tubulin folding cofactor E-like                                                                           | NM_173038    | 1.01 | 3.52E-04 |
| Peak1   | pseudopodium-enriched atypical kinase 1                                                                   | NM_172924    | 1.03 | 1.01E-03 |
| Cda     | cytidine deaminase                                                                                        | NM_028176    | 1.07 | 3.90E-02 |
| Cpm     | carboxypeptidase M                                                                                        | NM_027468    | 1.14 | 1.13E-04 |
| Sephs1  | selenophosphate synthetase 1                                                                              | NM_175400    | 1.16 | 1.81E-02 |
| Aggf1   | angiogenic factor with G patch and FHA domains 1                                                          | NM_025630    | 1.16 | 7.06E-03 |
| Brf1    | BRF1 homolog, subunit of RNA polymerase III transcription initiation factor IIIB ( <i>S. cerevisiae</i> ) | NM_028193    | 1.17 | 1.73E-03 |
| Parg    | poly (ADP-ribose) glycohydrolase                                                                          | NM_011960    | 1.18 | 4.48E-02 |
| Mef2a   | myocyte enhancer factor 2A                                                                                | NM_001033713 | 1.25 | 1.01E-02 |
| Usp38   | ubiquitin specific peptidase 38                                                                           | NM_027554    | 1.25 | 1.15E-02 |
| Tmem63a | transmembrane protein 63a                                                                                 | NM_144794    | 1.27 | 4.94E-02 |
| Kdm5b   | lysine (K)-specific demethylase 5B                                                                        | NM_152895    | 1.37 | 2.64E-02 |
| Csnk2a2 | casein kinase 2, alpha prime polypeptide                                                                  | NM_009974    | 1.38 | 6.07E-03 |
| Pard3b  | par-3 family cell polarity regulator beta                                                                 | NM_001081050 | 1.39 | 2.84E-02 |
| Adnp2   | ADNP homeobox 2                                                                                           | NM_175028    | 1.41 | 3.26E-02 |
| Cep72   | centrosomal protein 72                                                                                    | NM_028959    | 1.48 | 6.99E-03 |
| Cep290  | centrosomal protein 290                                                                                   | NM_146009    | 1.51 | 3.31E-02 |
| Slc41a2 | solute carrier family 41, member 2                                                                        | NM_177388    | 1.61 | 3.68E-02 |
| Vhl     | von Hippel-Lindau tumor suppressor                                                                        | NM_009507    | 1.66 | 3.07E-02 |
| Coq2    | coenzyme Q2 homolog, prenyltransferase (yeast)                                                            | NM_027978    | 1.66 | 3.91E-02 |
| Rptor   | regulatory associated protein of MTOR, complex 1                                                          | NM_028898    | 1.67 | 2.03E-02 |
| Coq10a  | coenzyme Q10 homolog A (yeast)                                                                            | NM_001081040 | 1.76 | 4.48E-02 |
| Pbx3    | pre B cell leukemia homeobox 3                                                                            | NM_016768    | 1.78 | 4.89E-02 |
| Bcdin3d | BCDIN3 domain containing                                                                                  | NM_029236    | 1.83 | 5.69E-04 |
| Osbpl7  | oxysterol binding protein-like 7                                                                          | NM_001081434 | 1.83 | 2.03E-02 |
| Zfp606  | zinc finger protein 606                                                                                   | NM_026112    | 1.87 | 1.08E-02 |
| Ago4    | argonaute RISC catalytic subunit 4                                                                        | NM_153177    | 2.01 | 4.27E-02 |
| Plagl2  | pleiomorphic adenoma gene-like 2                                                                          | NM_018807    | 2.05 | 4.27E-04 |

|               |                                                             |              |      |          |
|---------------|-------------------------------------------------------------|--------------|------|----------|
| Daam2         | dishevelled associated activator of morphogenesis 2         | NM_001008231 | 2.06 | 3.07E-02 |
| Adamts1       | ADAMTS-like 1                                               | NM_029967    | 2.09 | 6.13E-03 |
| Rad54l2       | RAD54 like 2 ( <i>S. cerevisiae</i> )                       | NM_030730    | 2.12 | 3.27E-03 |
| Urb1          | URB1 ribosome biogenesis 1 homolog ( <i>S. cerevisiae</i> ) | NM_029497    | 2.23 | 2.11E-02 |
| Dzank1        | double zinc ribbon and ankyrin repeat domains 1             | NM_172859    | 2.36 | 9.95E-03 |
| Pik3cb        | phosphatidylinositol 3-kinase, catalytic, beta polypeptide  | NM_029094    | 2.44 | 3.93E-03 |
| Abca4         | ATP-binding cassette, sub-family A (ABC1), member 4         | NM_007378    | 2.72 | 4.27E-02 |
| MacroD2       | MACRO domain containing 2                                   | NM_028387    | 2.91 | 2.97E-03 |
| Ttc39c        | tetratricopeptide repeat domain 39C                         | NM_028341    | 3.05 | 2.03E-02 |
| 4933417D19Rik | RIKEN cDNA 4933417D19 gene                                  | NR_045849    | 3.06 | 3.75E-02 |
| Snord15b      | small nucleolar RNA, C/D box 14B                            | NR_002173    | 3.40 | 1.72E-02 |
| Dpf3          | D4, zinc and double PHD fingers, family 3                   | NM_058212    | 3.51 | 6.04E-04 |
| Hal           | histidine ammonia lyase                                     | NM_010401    | 4.82 | 4.01E-05 |

**Supplemental Table 4.** Fold change in expression level of indicated genes in freshly isolated CD45<sup>c-kit</sup> cells 4 days after Saline or Doxorubicin (10mg/kg) injection. N=8 for each group. \* difference determined by Wilcoxon rank test.

| Gene name | Saline    | Doxorubicin    | P value       |
|-----------|-----------|----------------|---------------|
| Cdh5      | 1 ± 0.186 | 1.068 ± 0.056  | 0.736         |
| Vim       | 1 ± 0.160 | 1.084 ± 0.113  | 0.676         |
| Trp53     | 1 ± 0.144 | 1.152 ± 0.099  | 0.398         |
| Gata4     | 1 ± 0.116 | 1.410 ± 0.179  | 0.075         |
| Nkx2-5    | 1 ± 0.322 | 2.704 ± 0.357  | <b>0.003</b>  |
| Tbx5      | 1 ± 0.148 | 1.391 ± 0.204  | 0.143         |
| Myh6      | 1 ± 0.219 | 2.638 ± 0.419  | <b>0.004</b>  |
| Myh7      | 1 ± 0.860 | 16.790 ± 7.607 | <b>0.003*</b> |
| Nppa      | 1 ± 0.247 | 2.710 ± 0.406  | <b>0.003</b>  |
| Nppb      | 1 ± 0.324 | 3.417 ± 0.557  | <b>0.002</b>  |
| Myot      | 1 ± 0.736 | 6.144 ± 2.375  | 0.071         |
| Cib2      | 1 ± 0.427 | 2.899 ± 0.593  | <b>0.021</b>  |

# Supplemental Figure 1

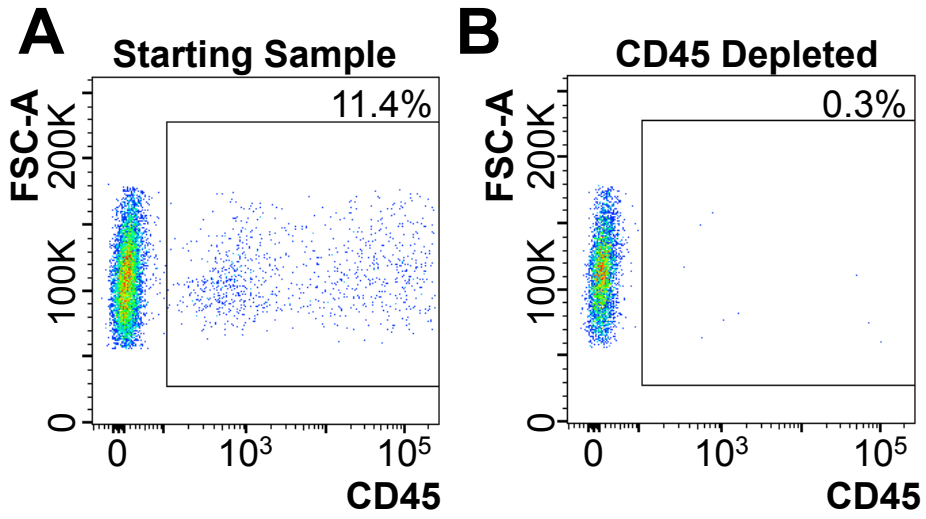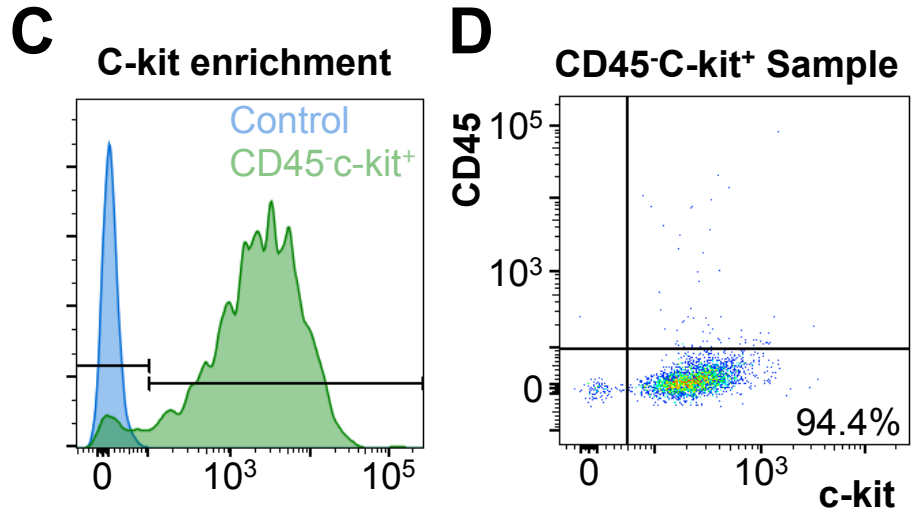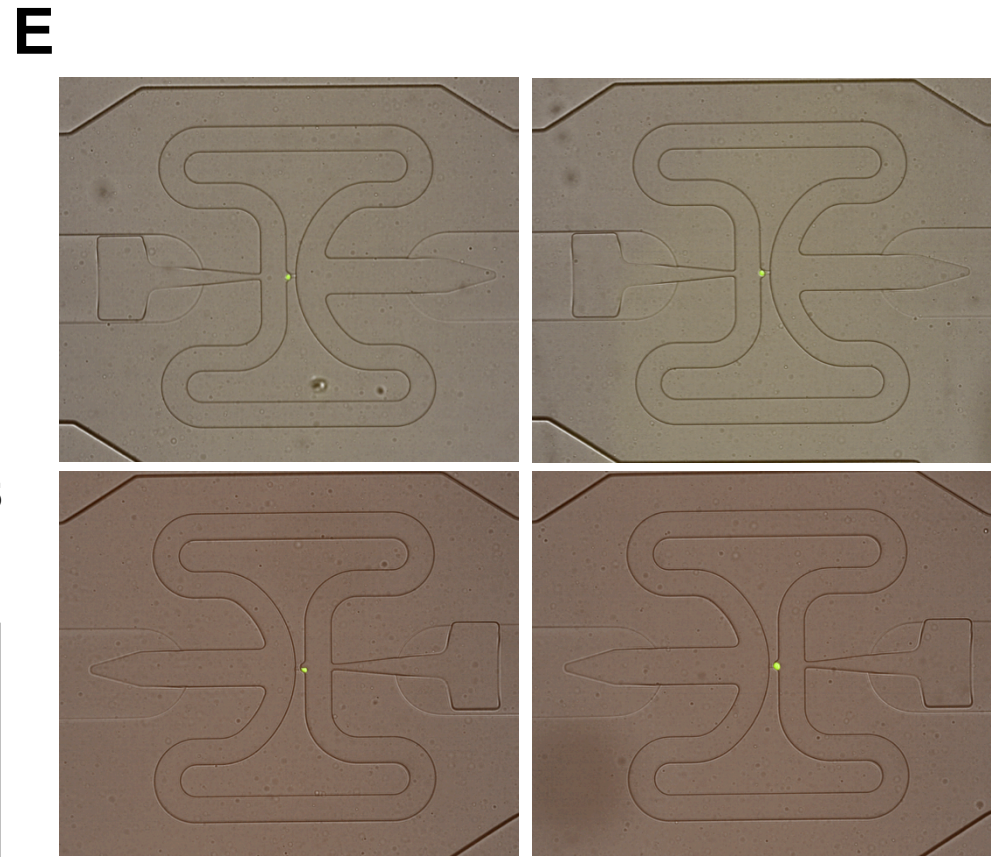

## Supplemental Figure 2

**A**

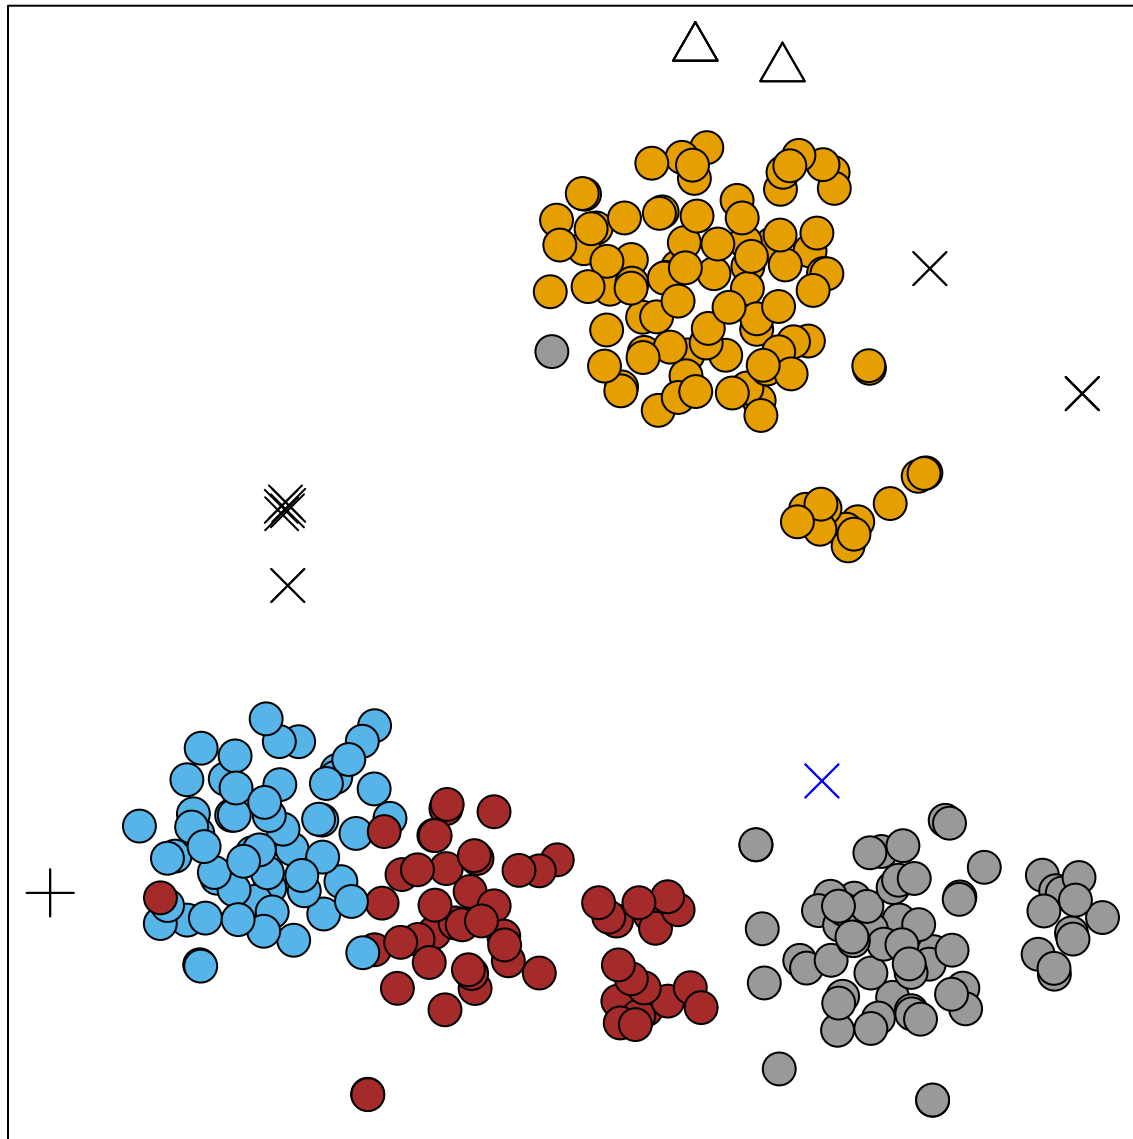

● Group 1    ● Group 3  
● Group 2    ● Group 4

+ Endothelial cell  
△ Fibroblast  
× Cardiomyocyte  
× Embryonic  
Cardiomyocyte

**B**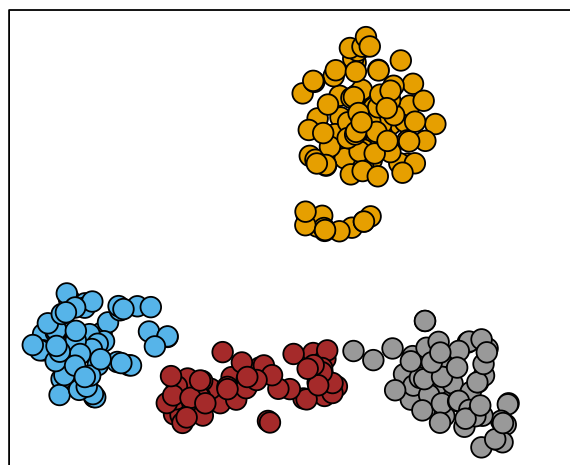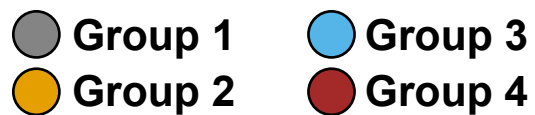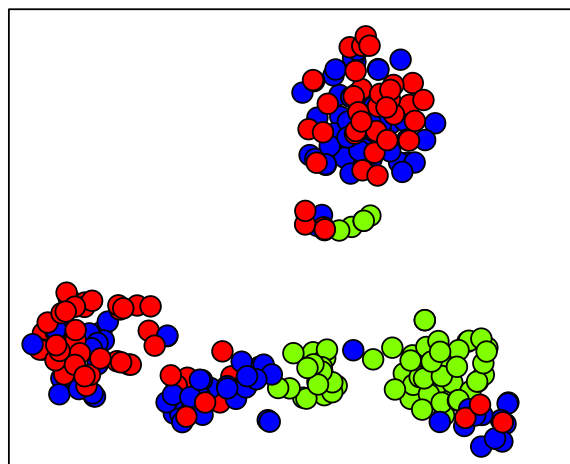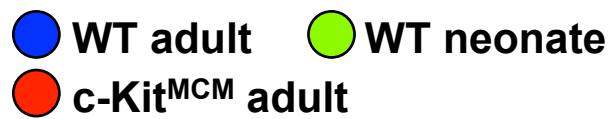**C**

Expression of 293 genes that distinguish c-kit<sup>+</sup> from other cardiac progenitor cells from Dey et al.

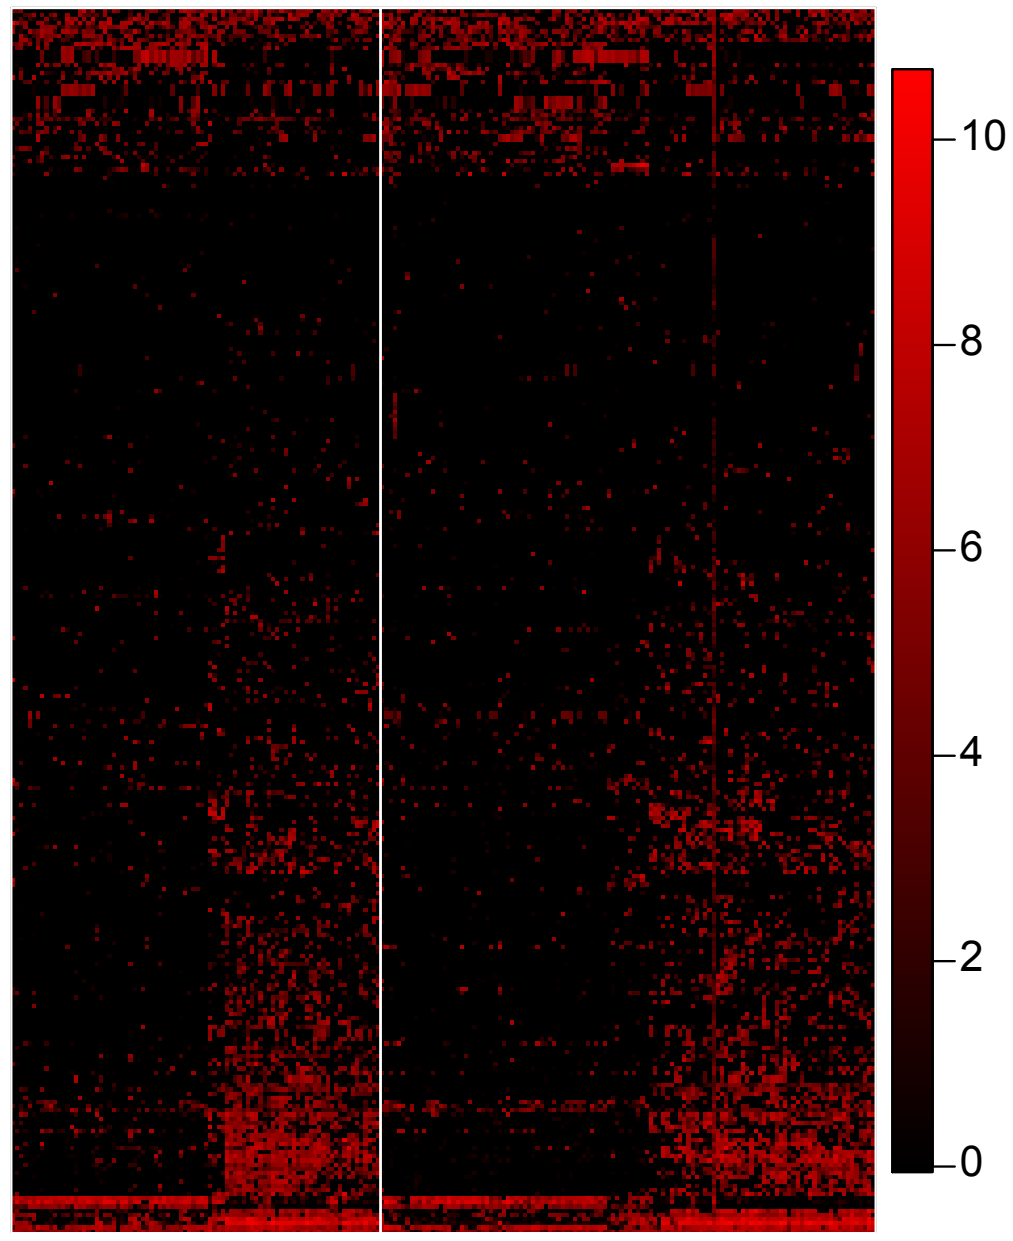

88 c-kit<sup>MCM</sup> cells

118 wt cells

# Supplemental Figure 3

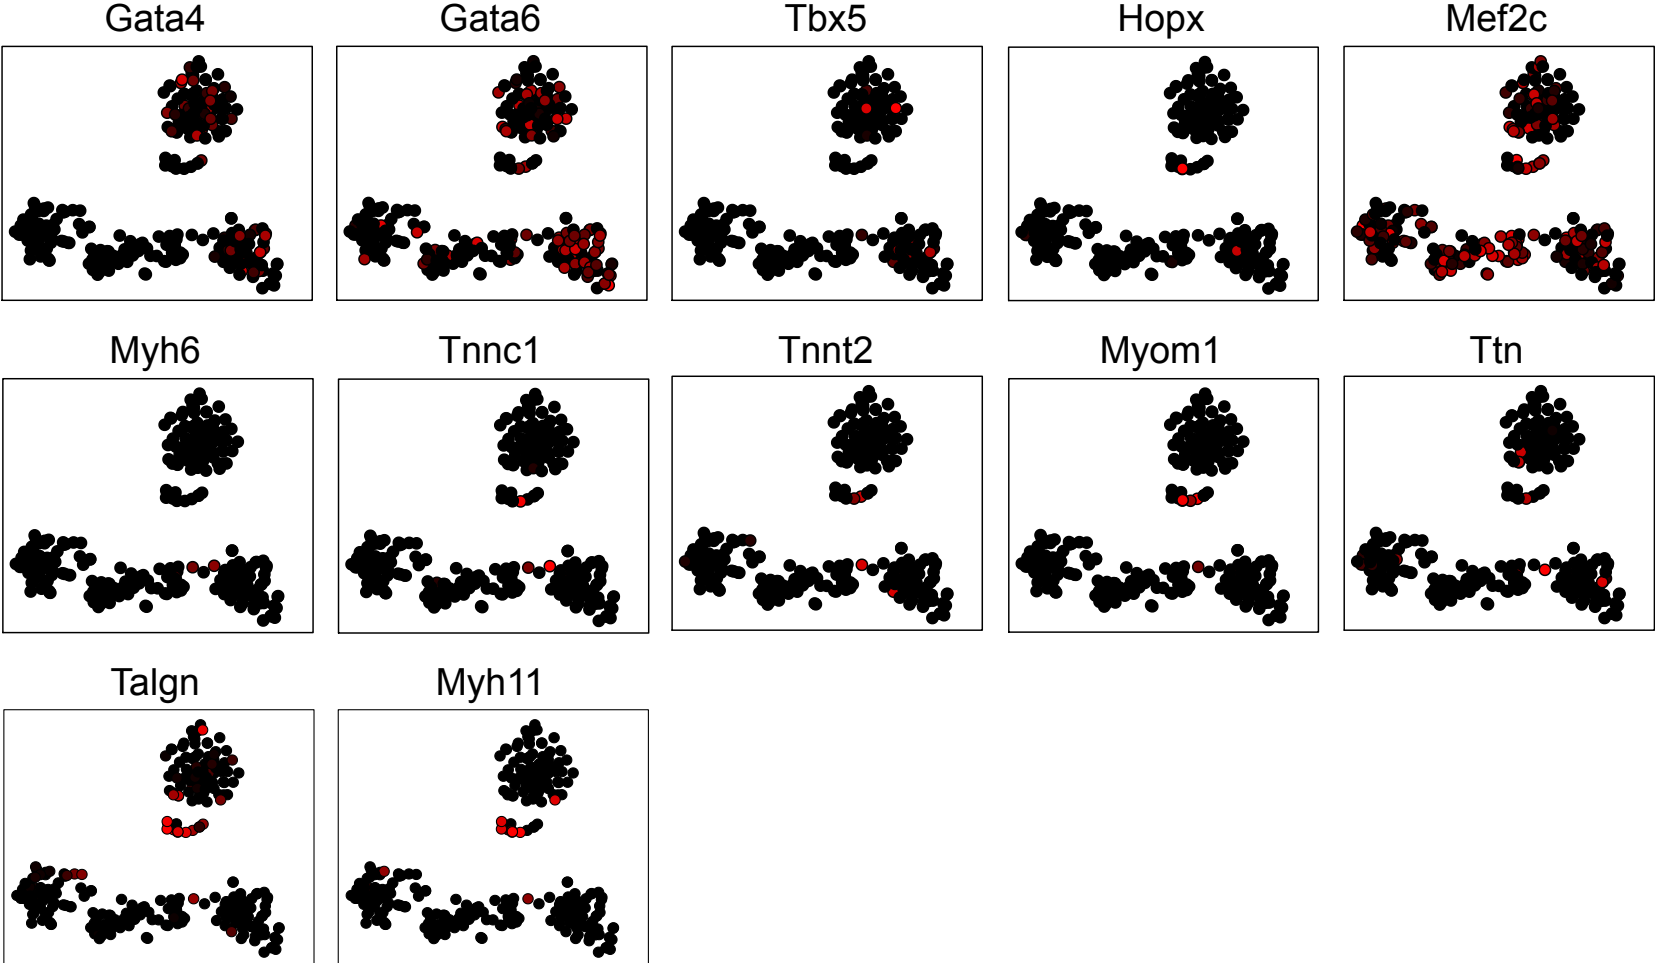



# Supplemental Figure 4

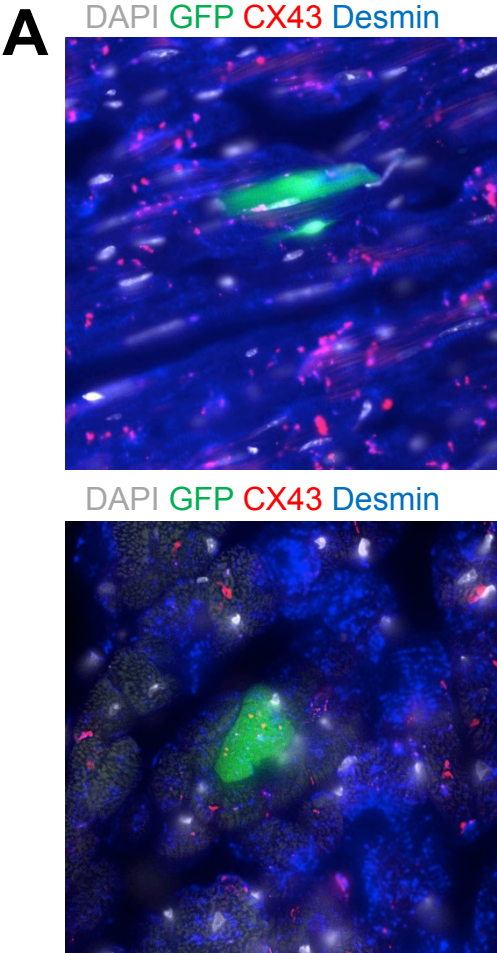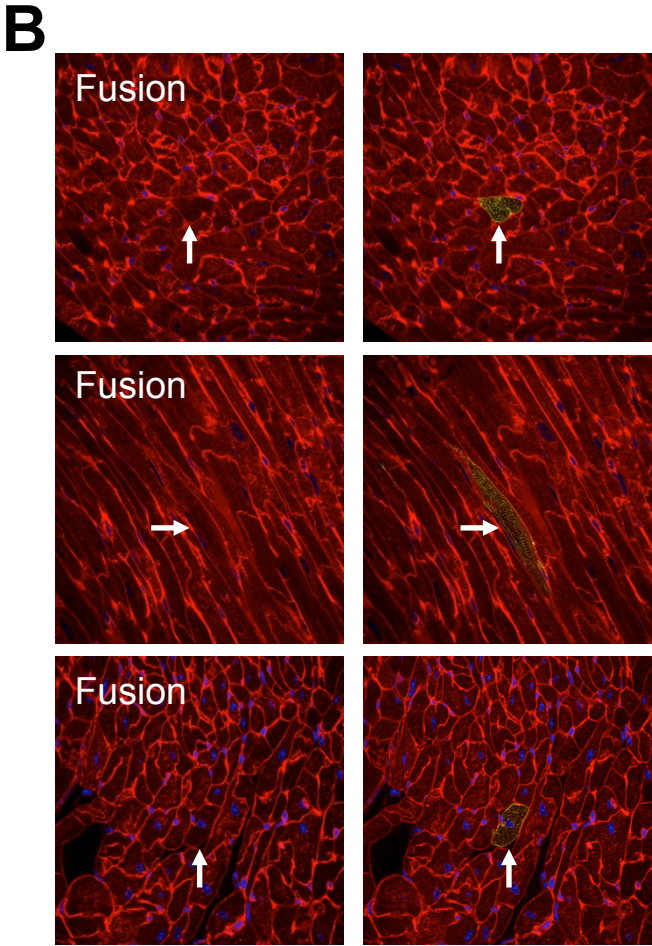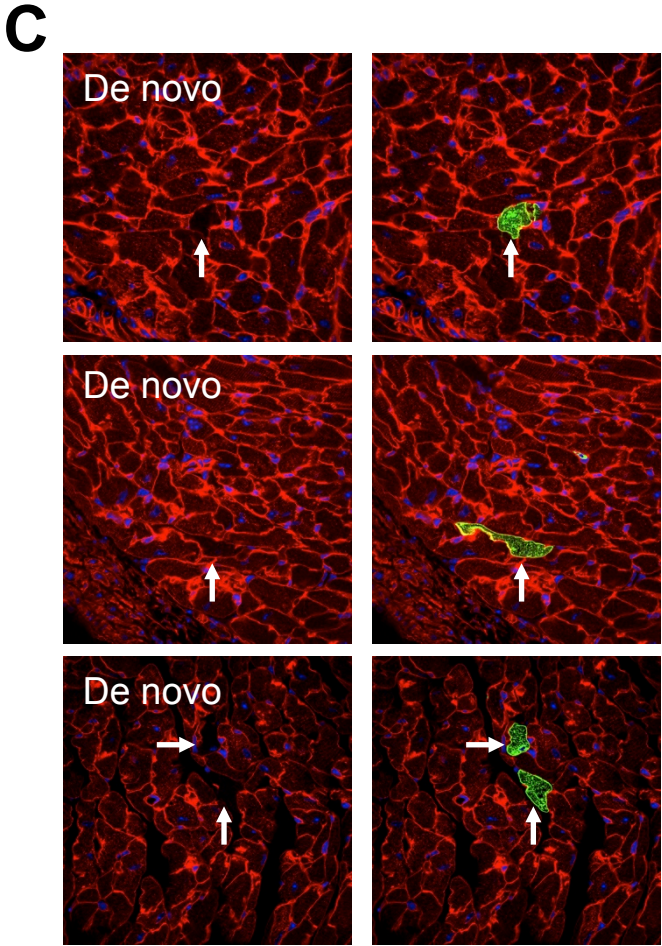

## Supplemental Figure 5

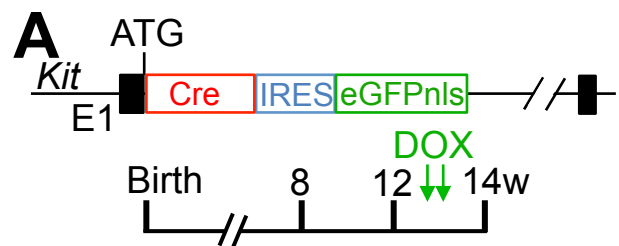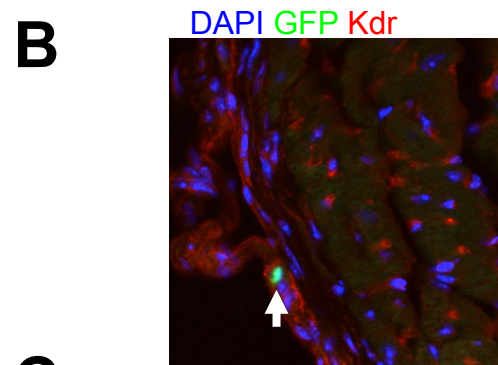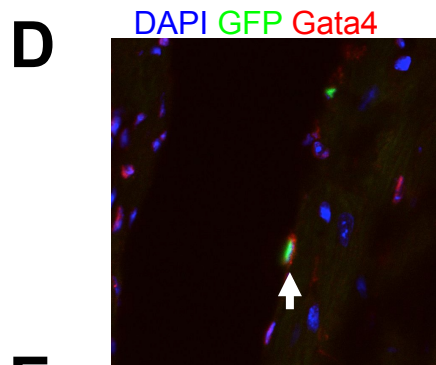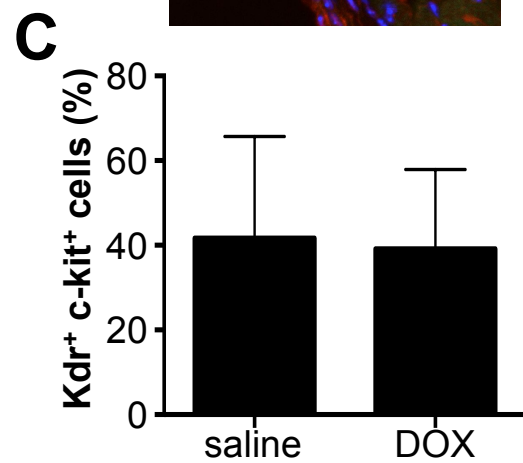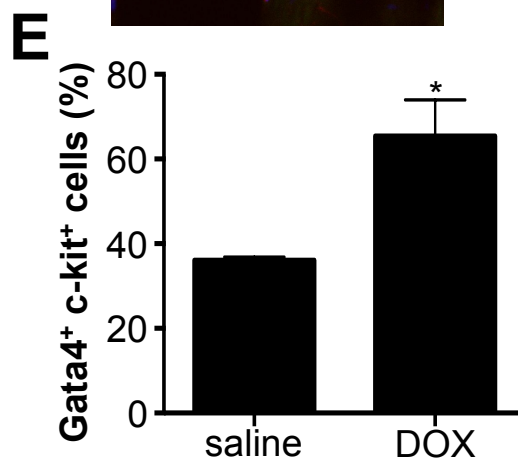



# Supplemental Figure 6

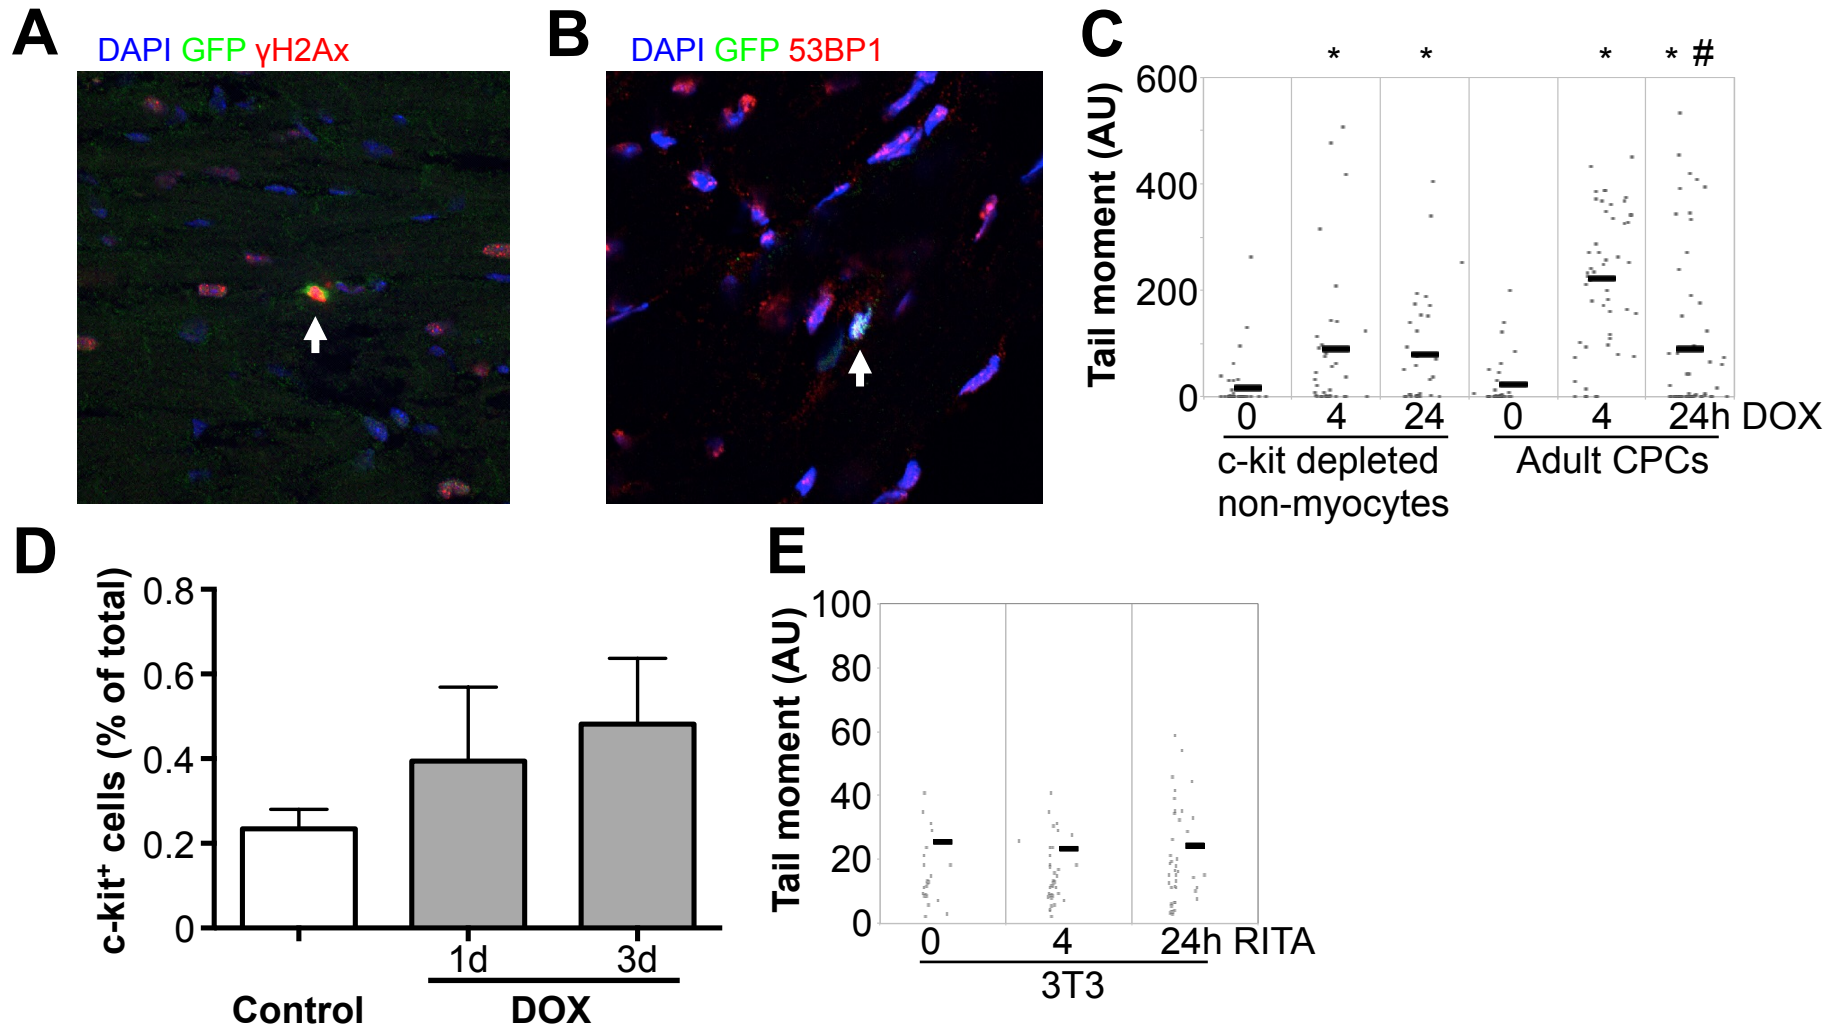

## Supplemental Figure Legends

**Supplemental Figure 1.** Evaluation of the purity of isolated CD45<sup>-</sup>c-kit<sup>+</sup> cells. Cells isolated from mice were stained with antibodies for CD45 (**A-D**) and c-kit (**C-D**), followed by flow cytometry assays. (**A, B**) CD45 expression in all non-cardiomyocytes isolated from the heart (**A**) and CD45<sup>+</sup>-depleted cells (**B**); (**C**) c-kit<sup>+</sup> enrichment after positive selection with a magnetic bead conjugated c-kit-antibody; (**D**) CD45 and c-kit expression in a final cell sample. **E.** Examples of individual live single cells captured on Fluidigm small cell IFC (Green/Red is Live/Dead stain).

**Supplemental Figure 2.** Single Cell Sequencing of cardiac CD45<sup>-</sup>c-kit<sup>+</sup> cells. **A.** Co-clustering between single cell sequenced CD45<sup>-</sup>c-kit<sup>+</sup> cells and previously published RNA-seq datasets for endothelial cells, fibroblasts and cardiomyocytes, visualized on a t-SNE plot. **B.** Visualization of origin of cells used for single cell sequencing for identified clusters. **C.** Heatmap of genes selected from Dey et al. (PMID 23463815) as genes that distinguish cardiac-derived c-kit<sup>+</sup> cells from other progenitor cells. Plotted is a heatmap for all cells from adult wt and adult Kit<sup>+/MCM</sup> mice, which shows essentially no differences between wt and Kit<sup>+/MCM</sup> c-kit<sup>+</sup> cells.

**Supplemental Figure 3.** Heatmap expression of selected genes that are commonly expressed in cardiomyocytes (Gata4, Gata6, Tbx5, Hopx, Mef2c, Myh6, Tnnc1, Tnnt2, Myom1, Ttn) or smooth muscle cells (Talgn, Myh11) plotted onto single cell sequencing clusters failed to identify specific cells that are likely to become cardiomyocytes.

**Supplemental Figure 4. A.** Immunohistochemistry for DAPI (grey), GFP (green), Connexin 43 (red), Desmin (blue) showing normal Connexin 43 distribution in GFP<sup>+</sup> cardiomyocytes. (**B-C**) Examples of Fusion and De Novo c-kit derived cardiomyocytes. **B.** Examples of Tomato and GFP double positive cardiomyocytes in response to DOX. **C.** Examples of GFP only positive cardiomyocytes in response to DOX

**Supplemental Figure 5. A.** Experimental design used in panels **B-E**. **B.** Immunohistochemistry for Kdr (red), GFP (green), DAPI (blue) showing Kdr expression in c-kit<sup>+</sup> cells. **C.** Quantification of Kdr expressing c-kit<sup>+</sup> cells. N=3 and 4 **D.** Representative immunohistochemistry for GATA4 (red), GFP (green), DAPI (blue) showing GATA4 expression in c-kit<sup>+</sup> cells. **E.** Quantification of GATA4 expressing c-kit<sup>+</sup> cells. N=3 and 4, \*p<0.05

**Supplemental Figure 6. A.** Immunohistochemistry for  $\gamma$ H2Ax (red), GFP (green), DAPI (blue) showing  $\gamma$ H2Ax expression in c-kit<sup>+</sup> cells (green). **B.** Immunohistochemistry for 53BP1 (red), GFP (green), DAPI (blue) showing 53BP1 expression in c-kit<sup>+</sup> cells (green). **C.** c-kit<sup>+</sup> depleted non-myocytes and c-kit<sup>+</sup> CPCs isolated from adult mice were treated with 0.5 $\mu$ M DOX for 0, 4 or 24 hours, followed by comet assays. Depicted is the tail moment (indicative for DNA damage) at indicated time points after DOX addition **D.** Quantification of percentage of cells that stained positive for c-kit in saline or DOX treated hearts. **E.** Cultured 3T3fibroblasts were treated with 13nM RITA for 0, 4, or 24 hours. Tail moment was measured from individual cell images after comet assays. \* p<0.05, compared with 0-hr c-kit depleted non-myocytes; # p<0.05, compared with 4-hr adult CPCs

## Supplemental References

1. van Berlo JH, Kanisicak O, Maillet M, Vagnozzi RJ, Karch J, Lin SC, Middleton RC, Marbán E and Molkenkin JD. c-kit<sup>+</sup> cells minimally contribute cardiomyocytes to the heart. *Nature*. 2014;509:337-41.
2. García-Cao I, García-Cao M, Martín-Caballero J, Criado LM, Klatt P, Flores JM, Weill JC, Blasco MA and Serrano M. "Super p53" mice exhibit enhanced DNA damage response, are tumor resistant and age normally. *EMBO J*. 2002;21:6225-35.
3. Robinson SP, Langan-Fahey SM, Johnson DA and Jordan VC. Metabolites, pharmacodynamics, and pharmacokinetics of tamoxifen in rats and mice compared to the breast cancer patient. *Drug Metab Dispos*. 1991;19:36-43.
4. van Berlo JH, Elrod JW, van den Hoogenhof MM, York AJ, Aronow BJ, Duncan SA and Molkenkin JD. The transcription factor GATA-6 regulates pathological cardiac hypertrophy. *Circ Res*. 2010;107:1032-40.
5. Smith AJ, Lewis FC, Aquila I, Waring CD, Nocera A, Agosti V, Nadal-Ginard B, Torella D and Ellison GM. Isolation and characterization of resident endogenous c-Kit<sup>+</sup> cardiac stem cells from the adult mouse and rat heart. *Nat Protoc*. 2014;9:1662-81.
6. Gong W, Rasmussen TL, Singh BN, Koyano-Nakagawa N, Pan W and Garry DJ. Dpath software reveals hierarchical haemato-endothelial lineages of Etv2 progenitors based on single-cell transcriptome analysis. *Nat Commun*. 2017;8:14362.
7. Tallini YN, Greene KS, Craven M, Spealman A, Breitbach M, Smith J, Fisher PJ, Steffey M, Hesse M, Doran RM, Woods A, Singh B, Yen A, Fleischmann BK and Kotlikoff MI. c-kit expression identifies cardiovascular precursors in the neonatal heart. *Proc Natl Acad Sci U S A*. 2009;106:1808-13.
8. L'Ecuyer T, Sanjeev S, Thomas R, Novak R, Das L, Campbell W and Heide RV. DNA damage is an early event in doxorubicin-induced cardiac myocyte death. *Am J Physiol Heart Circ Physiol*. 2006;291:H1273-80.
9. Olive PL and Banáth JP. The comet assay: a method to measure DNA damage in individual cells. *Nat Protoc*. 2006;1:23-9.
10. Gyori BM, Venkatachalam G, Thiagarajan PS, Hsu D and Clement MV. OpenComet: an automated tool for comet assay image analysis. *Redox Biol*. 2014;2:457-65.
11. Love MI, Huber W and Anders S. Moderated estimation of fold change and dispersion for RNA-seq data with DESeq2. *Genome Biol*. 2014;15:550.
12. Kiselev VY, Kirschner K, Schaub MT, Andrews T, Yiu A, Chandra T, Natarajan KN, Reik W, Barahona M, Green AR and Hemberg M. SC3: consensus clustering of single-cell RNA-seq data. *Nat Methods*. 2017;14:483-486.
13. van der Maaten L and Hinton G. Visualizing Data using t-SNE. *Journal of Machine Learning Research*. 2008;9:2579-2605.
14. Tibshirani R, Walther G and Hastie T. Estimating the number of clusters in a data set via the gap statistic. *Journal of the Royal Statistical Society Series B (Statistical Methodology)*. 2001;63:411-423.
15. Li G, Plonowska K, Kuppusamy R, Sturzu A and Wu SM. Identification of cardiovascular lineage descendants at single-cell resolution. *Development*. 2015;142:846-57.
16. Li G, Xu A, Sim S, Priest JR, Tian X, Khan T, Quertermous T, Zhou B, Tsao PS, Quake SR and Wu SM. Transcriptomic Profiling Maps Anatomically Patterned Subpopulations among Single Embryonic Cardiac Cells. *Dev Cell*. 2016;39:491-507.
17. DeLaughter DM, Bick AG, Wakimoto H, McKean D, Gorham JM, Kathiriya IS, Hinson JT, Homsy J, Gray J, Pu W, Bruneau BG, Seidman JG and Seidman CE. Single-Cell Resolution of Temporal Gene Expression during Heart Development. *Dev Cell*. 2016;39:480-490.

18. Pillai IC, Li S, Romay M, Lam L, Lu Y, Huang J, Dillard N, Zemanova M, Rubbi L, Wang Y, Lee J, Xia M, Liang O, Xie YH, Pellegrini M, Lusic AJ and Deb A. Cardiac Fibroblasts Adopt Osteogenic Fates and Can Be Targeted to Attenuate Pathological Heart Calcification. *Cell Stem Cell*. 2017;20:218-232.e5.
19. Sangwung P, Zhou G, Nayak L, Chan ER, Kumar S, Kang DW, Zhang R, Liao X, Lu Y, Sugi K, Fujioka H, Shi H, Lapping SD, Ghosh CC, Higgins SJ, Parikh SM, Jo H and Jain MK. KLF2 and KLF4 control endothelial identity and vascular integrity. *JCI Insight*. 2017;2:e91700.
20. Greco CM, Kunderfranco P, Rubino M, Larcher V, Carullo P, Anselmo A, Kurz K, Carell T, Angius A, Latronico MV, Papait R and Condorelli G. DNA hydroxymethylation controls cardiomyocyte gene expression in development and hypertrophy. *Nat Commun*. 2016;7:12418.
21. Zhou H, Dickson ME, Kim MS, Bassel-Duby R and Olson EN. Akt1/protein kinase B enhances transcriptional reprogramming of fibroblasts to functional cardiomyocytes. *Proc Natl Acad Sci U S A*. 2015;112:11864-9.
22. Sprenger JU, Perera RK, Steinbrecher JH, Lehnart SE, Maier LS, Hasenfuss G and Nikolaev VO. In vivo model with targeted cAMP biosensor reveals changes in receptor-microdomain communication in cardiac disease. *Nat Commun*. 2015;6:6965.
23. Dey D, Han L, Bauer M, Sanada F, Oikonomopoulos A, Hosoda T, Unno K, De Almeida P, Leri A and Wu JC. Dissecting the molecular relationship among various cardiogenic progenitor cells. *Circ Res*. 2013;112:1253-62.
24. Finak G, McDavid A, Yajima M, Deng J, Gersuk V, Shalek AK, Slichter CK, Miller HW, McElrath MJ, Prlic M, Linsley PS and Gottardo R. MAST: a flexible statistical framework for assessing transcriptional changes and characterizing heterogeneity in single-cell RNA sequencing data. *Genome Biol*. 2015;16:278.
25. Livak KJ and Schmittgen TD. Analysis of relative gene expression data using real-time quantitative PCR and the 2<sup>-</sup>( $\Delta\Delta C_T$ ) Method. *Methods*. 2001;25:402-8.
